# Supplementary material for: Spatial Ecology and Diel Activity of European Wildcat (Felis silvestris) in a Protected Lowland Area in Northern Greece
Source: MDPI journal article supplement (doi:10.3390/ani11113030), 2021-10-21
Supplement: s1 [file s1]

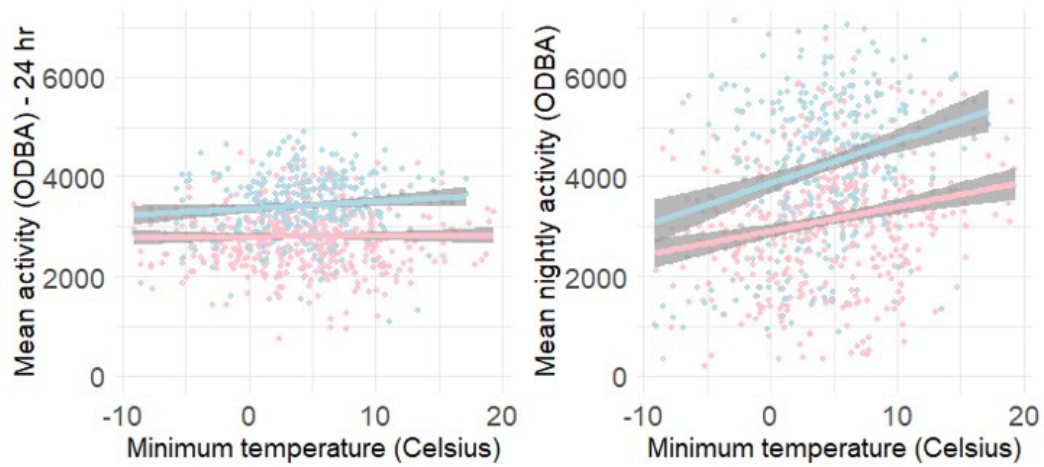

**Figure S1.** Response curve of mean 24-hr (left) and nighttime (right) activity, as measured in ODBA value, of male (blue) and female (pink) wildcats to minimum daily temperature (shaded areas show the 95% confidence intervals).

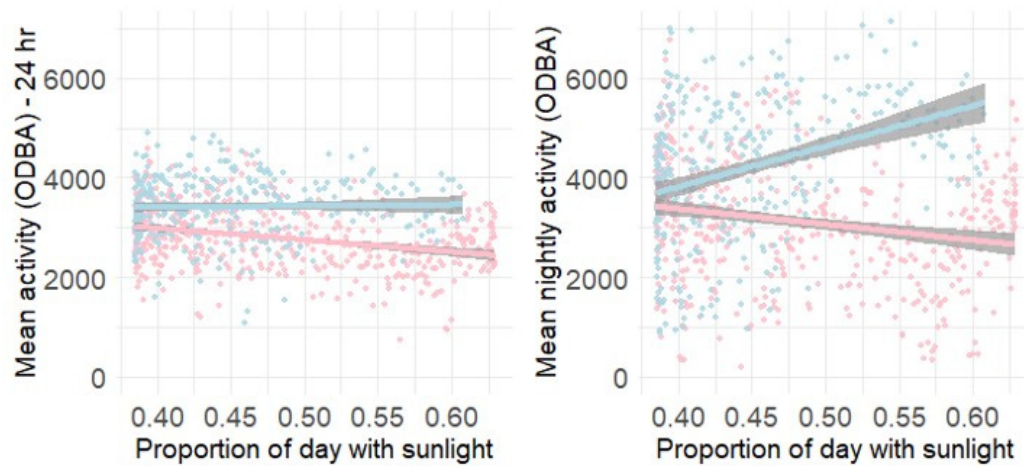

**Figure S2.** Response curve of mean 24-hr (left) and nighttime (right) activity, as measured in ODBA value, of male (blue) and female (pink) wildcats to day length (i.e. proportion of day with sunlight) (shaded areas show the 95% confidence intervals).

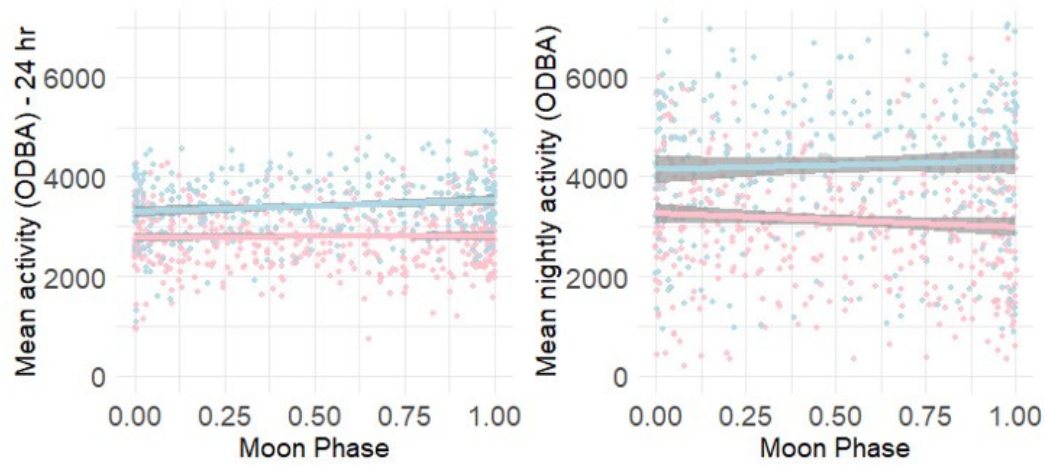

**Figure S3.** Response curve of mean 24-hr (left) and nighttime (right) activity, as measured in ODBA value, of male (blue) and female (pink) wildcats to the phase of the moon (0 no moon – 1 full moon) (shaded areas show the 95% confidence intervals).
