# Supplementary material for: Spatial Ecology and Diel Activity of European Wildcat (Felis silvestris) in a Protected Lowland Area in Northern Greece
Source: MDPI journal article supplement (doi:10.3390/ani11113030), 2021-10-21
Supplement: s1 [file s1]

**Table S1:** AICc model selection (top 5 models + null model) of the global model  $\log(\text{ODBA}) = \beta_0 + \text{daylength} + \text{moon phase} + \text{min temperature}$ , where ODBA refers to mean 24-hr wildcat activity. The models included in the final model average are marked in bold.

| Model notation                                                                                                  | df       | LogLik          | AICc           | $\Delta\text{AICc}$ | AICw         |
|-----------------------------------------------------------------------------------------------------------------|----------|-----------------|----------------|---------------------|--------------|
| <b><math>\log(\text{ODBA}) = \beta_0 + \text{daylength} + \text{moon phase} + \text{min temperature}</math></b> | <b>6</b> | <b>-6229.43</b> | <b>12471</b>   | <b>0</b>            | <b>0.536</b> |
| <b><math>\log(\text{ODBA}) = \beta_0 + \text{daylength} + \text{min temperature}</math></b>                     | <b>5</b> | <b>-6230.59</b> | <b>12471.3</b> | <b>0.29</b>         | <b>0.464</b> |
| $\log(\text{ODBA}) = \beta_0 + \text{daylength} + \text{moon phase}$                                            | 5        | -6239.29        | 12488.6        | 17.69               | 0            |
| $\log(\text{ODBA}) = \beta_0 + \text{daylength}$                                                                | 4        | -6240.46        | 12489          | 18                  | 0            |
| $\log(\text{ODBA}) = \beta_0 + \text{moon phase} + \text{min temperature}$                                      | 5        | -6249.75        | 12509.6        | 38.61               | 0            |
| $\log(\text{ODBA}) = \beta_0$ (null model)                                                                      | 3        | -6252.74        | 12511.5        | 40.54               | 0            |

Random effect (individual animal) was kept identical in all GLMM models.

**Table S2:** AICc model selection (top 5 models + null model) of the global model  $\log(\text{ODBA}) = \beta_0 + \text{daylength} + \text{rain} + \text{min temperature}$ , where ODBA refers to mean nighttime wildcat activity (6:30pm – 6:30am). The models included in the final model average are marked in bold.

| Model notation                                                                                             | df       | LogLik          | AICc           | $\Delta\text{AICc}$ | AICw         |
|------------------------------------------------------------------------------------------------------------|----------|-----------------|----------------|---------------------|--------------|
| <b><math>\log(\text{ODBA}) = \beta_0 + \text{day length} + \text{min temperature}</math></b>               | <b>5</b> | <b>-6841.76</b> | <b>13693.6</b> | <b>0</b>            | <b>0.733</b> |
| <b><math>\log(\text{ODBA}) = \beta_0 + \text{day length} + \text{rain} + \text{min temperature}</math></b> | <b>6</b> | <b>-6841.76</b> | <b>13695.6</b> | <b>2.03</b>         | <b>0.266</b> |
| $\log(\text{ODBA}) = \beta_0 + \text{min temperature}$                                                     | 4        | -6849.96        | 13708          | 14.37               | 0.001        |
| $\log(\text{ODBA}) = \beta_0 + \text{rain} + \text{min temperature}$                                       | 5        | -6849.36        | 13708.8        | 15.21               | 0            |
| $\log(\text{ODBA}) = \beta_0 + \text{precipitation}$                                                       | 4        | -6872.53        | 13753.1        | 59.52               | 0            |
| $\log(\text{ODBA}) = \beta_0$ (null model)                                                                 | 4        | -6875.05        | 13758.2        | 64.56               | 0            |

Random effect (individual animal) was kept identical in all GLMM models.

**Table S3:** AICc model selection (top 5 models + null model) of the global model  $\log(\text{ODBA}) = \beta_0 + \% \text{ forest} + \% \text{ forest}^2 + \text{darkness} + \% \text{ forest} * \text{darkness}$ , where ODBA refers to mean nighttime wildcat activity (6:30pm – 6:30am). The best model used is marked in bold.

| Model notation                                                                                                                                    | df | LogLik           | AICc             | $\Delta\text{AICc}$ | AICw     |
|---------------------------------------------------------------------------------------------------------------------------------------------------|----|------------------|------------------|---------------------|----------|
| <b><math>\log(\text{ODBA}) = \beta_0 + \% \text{ forest} + \% \text{ forest}^2 + \text{darkness} + \% \text{ forest} * \text{darkness}</math></b> | 7  | <b>-261520.4</b> | <b>5230054.8</b> | <b>0</b>            | <b>1</b> |
| $\log(\text{ODBA}) = \beta_0 + \% \text{ forest} + \text{darkness} + \% \text{ forest} * \text{darkness}$                                         | 6  | -261561.8        | 523135.6         | 80.81               | 0        |
| $\log(\text{ODBA}) = \beta_0 + \% \text{ forest} + \% \text{ forest}^2 + \text{darkness}$                                                         | 6  | -261568.1        | 523148.3         | 93.51               | 0        |
| $\log(\text{ODBA}) = \beta_0 + \% \text{ forest} + \text{darkness}$                                                                               | 5  | -261604.8        | 523219.6         | 164.77              | 0        |
| $\log(\text{ODBA}) = \beta_0 + \text{darkness}$                                                                                                   | 4  | -261614.3        | 523236.6         | 181.78              | 0        |
| $\log(\text{ODBA}) = \beta_0$ (null model)                                                                                                        | 3  | -262313/1        | 524632.2         | 1577.39             | 0        |

Random effect (individual animal) was kept identical in all GLMM models.

**Table S4:** Model estimates and significance of the environmental variables predicting wildcat at non-resting points, as measured in ODBA (mean ODBA value for a period of 15 min before and after the GPS record)) ( $R^2=0.074$ )

| Variables               | Estimate | SE    | df        | t-value | $\text{Pr}( >  z  )$ |
|-------------------------|----------|-------|-----------|---------|----------------------|
| intercept ( $\beta_0$ ) | 3610.0   | 156.2 | 4.324     | 23.117  | <0.0001              |
| % forest                | -2704.7  | 212.4 | 27614.361 | -12.736 | <0.0001              |
| % forest <sup>2</sup>   | 2351.8   | 258.1 | 27708.222 | 9.112   | <0.0001              |
| darkness                | 872.2    | 39.6  | 28241.937 | 22.023  | <0.0001              |
| % forest*darkness       | 1444.8   | 147.7 | 28241.097 | 9.781   | <0.0001              |
